# Supplementary material for: Arctic Surface Snow Interactions with the Atmosphere: Spatio-Temporal Isotopic Variability During the MOSAiC Expedition
Source: Copernicus journal article supplement (doi:10.5194/egusphere-2024-719), 2024-03-20
Supplement: Supplementary file 1 [file egusphere-2024-719-supplement.pdf]

**Supplementary material:**

| Parameter   | $\delta^{18}\text{O}$ (‰) |       |       |          |        |       |       |            |       |       |                 |       |       | <i>d-excess</i> (‰) |          |      |        |      |        |            |      |      |                 |      |       |      |      |
|-------------|---------------------------|-------|-------|----------|--------|-------|-------|------------|-------|-------|-----------------|-------|-------|---------------------|----------|------|--------|------|--------|------------|------|------|-----------------|------|-------|------|------|
|             | Surface Snow              |       |       |          | Vapour |       |       | Ny-Ålesund |       |       | Samoylov Island |       |       | Surface Snow        |          |      | Vapour |      |        | Ny-Ålesund |      |      | Samoylov Island |      |       |      |      |
| Site        | Min.                      | Med.  | Max.  | <i>N</i> | Min.   | Med.  | Max.  | Min.       | Med.  | Max.  | <i>N</i>        | Min.  | Med.  | Max.                | <i>N</i> | Min. | Med.   | Max. | Min.   | Med.       | Max. | Min. | Med.            | Max. | Min.  | Med. | Max. |
| Oct-2019    | 26.12                     | 20.69 | -3.57 | 7        | 43.93  | 36.90 | 23.54 |            |       |       |                 | 22.89 | 20.83 | 16.27               | 5        | -1.4 | 12.0   | 23.0 | -0.6   | 10.7       | 17.1 |      |                 |      | 0.9   | 5.8  | 12.8 |
| Nov-2019    | 26.34                     | 15.75 | -6.53 | 24       | 46.63  | 39.98 | 26.51 |            |       |       |                 | 29.21 | 28.55 | 24.78               | 3        | -1.8 | 12.6   | 20.1 | -19.9  | 9.2        | 15.8 |      |                 |      | 8.3   | 12.3 | 14.0 |
| Dec-2019    | 24.17                     | 19.84 | 13.34 | 10       | 47.85  | 38.72 | 33.60 |            |       |       |                 | 34.30 | 32.91 | 30.58               | 5        | 11.1 | 16.1   | 21.0 | -2.8   | 7.4        | 13.9 |      |                 |      | -5.7  | 0.5  | 3.8  |
| Jan-2020    | 39.63                     | 26.67 | 17.45 | 37       | 45.34  | 41.89 | 33.76 |            |       |       |                 | 36.87 | 33.54 | 28.46               | 3        | 5.9  | 18.8   | 35.5 | -21.6  | 1.5        | 9.6  |      |                 |      | -16.4 | 3.7  | 5.3  |
| Feb-2020    | 38.00                     | 27.85 | 14.40 | 32       | 45.64  | 39.09 | 33.28 |            |       |       |                 | 35.90 | 25.46 | 24.47               | 6        | -2.0 | 18.2   | 30.8 | -24.2  | -1.0       | 6.3  |      |                 |      | -4.4  | 7.4  | 13.4 |
| Mar-2020    | 38.60                     | 32.99 | 16.10 | 17       | 46.26  | 42.79 | 24.22 |            |       |       |                 | 31.05 | 28.38 | 26.13               | 7        | -    | 15.5   | 27.7 | -120.7 | -0.2       | 9.0  |      |                 |      | 4.7   | 6.6  | 9.2  |
| Apr-2020    | 33.70                     | 23.31 | 14.79 | 25       | 45.31  | 37.68 | 19.30 |            |       |       |                 | 27.51 | 19.94 | 17.26               | 9        | 0.8  | 11.3   | 25.8 | -1.1   | 6.4        | 13.7 |      |                 |      | -45.2 | 8.3  | 12.5 |
| May-2020    | 31.76                     | 25.25 | 17.25 | 11       | 40.57  | 29.97 | 18.59 | -8.21      | -6.74 | -2.78 | 3               | 24.89 | 19.93 | 12.68               | 9        | 5.9  | 12.4   | 22.1 | -4.9   | 9.8        | 19.1 | -6.9 | -5.0            | 5.0  | 1.4   | 6.8  | 16.4 |
| Jun-2020    | 31.32                     | 16.50 | -5.40 | 12       | 31.42  | 24.25 | 19.23 | 14.82      | 10.77 | -7.27 | 4               | 16.93 | 14.67 | 12.19               | 12       | -    | 1.3    | 10.4 | -4.0   | 3.5        | 10.4 | 1.6  | 4.9             | 8.4  | -11.4 | -0.8 | 11.8 |
| Jul-2020    | 31.00                     | 10.70 | -0.40 | 13       | 27.27  | 18.82 | 11.84 | 12.10      | 10.11 | -7.61 | 6               | 17.67 | 15.83 | 13.87               | 11       | 41.2 | 0.9    | 13.8 | -12.9  | -5.9       | 6.2  | -4.1 | -2.2            | 2.5  | -1.0  | 10.5 | 12.1 |
| Aus-2020    | 17.54                     | 14.43 | -1.00 | 7        | 28.43  | 17.63 | 12.01 | 19.16      | 11.03 | -2.10 | 8               | 17.35 | 15.59 | 12.86               | 11       | -4.5 | 0.0    | 1.8  | -19.6  | -7.1       | 6.2  | -6.4 | 3.9             | 14.0 | 1.6   | 9.3  | 17.5 |
| Sep-2020    | 18.70                     | 15.47 | 11.90 | 18       | 33.87  | 27.11 | 20.71 | 13.09      | -9.77 | -2.10 | 4               | 18.39 | 15.24 | 12.68               | 9        | -2.2 | 5.1    | 11.3 | -1.6   | 5.6        | 14.6 | 2.5  | 6.1             | 14.0 | 3.2   | 7.8  | 14.8 |
| MOSAIC Year | 39.63                     | 22.10 | -0.40 | 213      | 47.85  | 34.19 | 11.84 | 19.16      | 10.60 | -2.10 | 25              | 36.87 | 17.49 | 12.19               | 90       | -    | 13.1   | 35.5 | -120.7 | 4.2        | 19.1 | -6.9 | 2.5             | 14.0 | -45.2 | 6.3  | 17.5 |

**Table S1 Comparative Analysis of  $\delta^{18}\text{O}$  and *d-excess* Values in Surface Snow, Vapour, and Precipitation at Ny-Ålesund and Samoylov Island During MOSAiC. This table presents the minimum (Min.), median (Med.), and maximum (Max.) values of  $\delta^{18}\text{O}$  (in ‰) and *d-excess* (in ‰) observed in surface snow, vapour, and precipitation. Data are segmented by month, spanning from October 2019 to September 2020, to illustrate temporal variations and site-specific differences in isotopic composition. 'N' indicates the number of observations contributing to the analysis for each parameter and location within the specified time frame.**

5

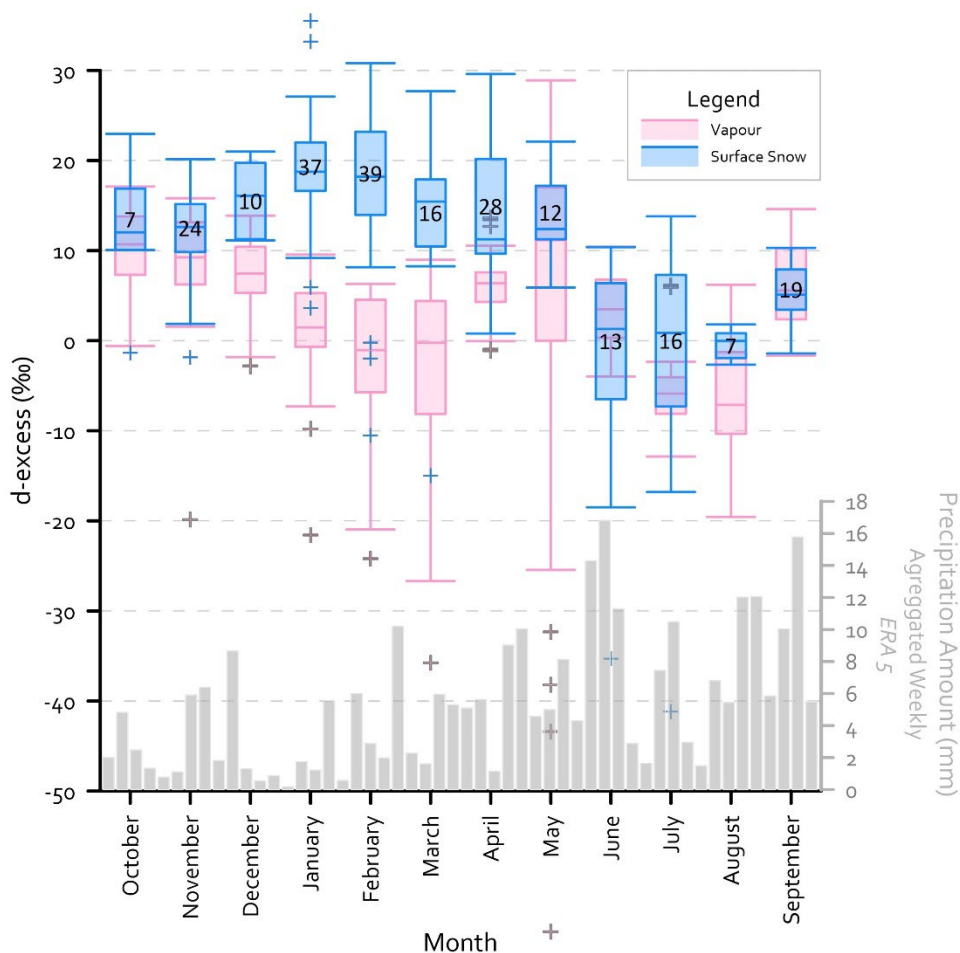

10 Figure S1 Monthly *d-excess* variations are presented as boxplots, for vapour (pink) and surface snow (blue) during the MOSAiC expedition (October 2019 to September 2020). Monthly median values of *d-excess* are indicated by the central line within each boxplot, while the box edges correspond to the 25th and 75th percentiles. Whiskers extend to the non-outlier maximum and minimum values, with outliers depicted as plus symbols. The number of samples analysed for each month is given in the boxes. A histogram of the aggregated weekly precipitation amount is shown as grey bars.
